# Supplementary material for: AT-hook DNA-binding motif-containing protein one knockdown downregulates EWS-FLI1 transcriptional activity in Ewing’s sarcoma cells
Source: PLoS One. 2022 Oct 4;17(10):e0269077. doi: 10.1371/journal.pone.0269077 (PMC9531837; doi:10.1371/journal.pone.0269077)
Supplement: S1 Table — (XLSX) [file pone.0269077.s010.xlsx]

## Sheet: S1 table
Table S1 Primers for shRNA
Target gene	Forward oligonucleotide	Sequence (5'-3')	Reverse oligonucleotide	Sequence (5'-3')
AHDC1	shAHDC1-f	GATCCGCACTGATAGGCCAAAGATCTTCCTGTCAGAATCTTTGGCCTATCAGTGCTTTTTG	shAHDC1-r	AATTCAAAAAGCACTGATAGGCCAAAGATTCTGACAGGAAGATCTTTGGCCTATCAGTGCG
FLI1	shFLI1-f	GATCCGGAAAAGCAAGCCCAACATCTTCCTGTCAGAATGTTGGGCTTGCTTTTCCTTTTTG	shFLI1-r	AATTCAAAAAGGAAAAGCAAGCCCAACATTCTGACAGGAAGATGTTGGGCTTGCTTTTCCG
EWSR1	shEWS-f1	GATCCGGACAGAGTAACTACAGTTCTTCCTGTCAGAAACTGTAGTTACTCTGTCCTTTTTG	shEWS-r1	AATTCAAAAAGGACAGAGTAACTACAGTTTCTGACAGGAAGAACTGTAGTTACTCTGTCCG
Underline means target shRNA region.
